# Supplementary material for: Two-stage tuberculosis diagnostics: combining centrifugal microfluidics to detect TB infection and Inh and Rif resistance at the point of care with subsequent antibiotic resistance profiling by targeted NGS
Source: Royal Society of Chemistry journal article supplement (doi:10.1039/d3lc00783a), 2023-11-16
Supplement: d3lc00783a1.xlsx [file d3lc00783a1.xlsx]

## Sheet: target_regions
H37Rv gene	start	stop	type	Rv number	coding strand	associated antibiotic resistance	length
gyrB upstream	4998	5239	intergenic		forward	moxifloxacin, gatifloxacin, ofloxacin, levofloxacin	242
gyrB	5240	7267	CDS	Rv0005	forward	moxifloxacin, gatifloxacin, ofloxacin, levofloxacin	2028
gyrA upstream	7268	7301	intergenic		forward	moxifloxacin, gatifloxacin, ofloxacin, levofloxacin	34
gyrA	7302	9818	CDS	Rv0006	forward	moxifloxacin, gatifloxacin, ofloxacin, levofloxacin	2517
pbpA	18759	20234	CDS	Rv0016c	reverse	beta-lactams	1476
ponA1 upstream	53245	53662	intergenic		forward	rifampicin, rifabutin, beta-lactams	418
ponA1	53663	55699	CDS	Rv0050	forward	rifampicin, rifabutin, beta-lactams	2037
ldtA	140267	141022	CDS	Rv0116c	reverse	beta-lactams	756
ldtA upstream	141023	141199	intergenic		reverse	beta-lactams	177
ldtE upstream	223531	223563	intergenic		forward	beta-lactams	33
ldtE	223564	224664	CDS	Rv0192	forward	beta-lactams	1101
inbR	330933	331658	CDS	Rv0275c	reverse	isoniazid	726
inbR upstream	331659	331747	intergenic		reverse	isoniazid	89
fgd1 upstream	490706	490782	intergenic		forward	delamanid, PA-824	77
fgd1	490783	491793	CDS	Rv0407	forward	delamanid, PA-824	1011
lprQ upstream	571649	571709	intergenic		forward	beta-lactams	61
lprQ	571710	573065	CDS	Rv0483	forward	beta-lactams	1356
mshA upstream	575301	575347	intergenic		forward	isoniazid, ethionamide, prothionamide	47
mshA	575348	576790	CDS	Rv0486	forward	isoniazid, ethionamide, prothionamide	1443
Rv0565c	656010	657470	CDS	Rv0565c	reverse	ethionamide, prothionamide	1461
Rv0565c upstream	657471	657547	intergenic		reverse	ethionamide, prothionamide	77
hadA upstream	731880	731929	intergenic		forward	thioacetazone	50
hadA,hadB,hadC	731930	733325	CDS	Rv0635, Rv0636, Rv0637	forward	thioacetazone	1396
mmaA4	736298	737203	CDS	Rv0642c	reverse	thioacetazone	906
mmaA4 upstream	737204	737267	intergenic		reverse	thioacetazone	64
mmaA3	737268	738149	CDS	Rv0643c	reverse	isoniazid, ethionamide, prothionamide	882
mmaA3 upstream	738150	738296	intergenic		reverse	isoniazid, ethionamide, prothionamide	147
mmaA2	738297	739160	CDS	Rv0644c	reverse	thioacetazone	864
mmaA2 upstream	739161	739326	intergenic		reverse	thioacetazone	166
rpoB upstream	759310	759806	intergenic		forward	rifampicin, rifabutin	497
rpoB	759807	763325	CDS	Rv0667	forward	rifampicin, rifabutin	3519
rpoC upstream	763326	763369	intergenic		forward	compensates for rpoB mutations	44
rpoC	763370	767320	CDS	Rv0668	forward	compensates for rpoB mutations	3951
mmpL5,mmpS5	775586	778905	CDS	Rv0676c	reverse	bedaquiline, clofazimine	3320
mmpR upstream	778906	778989	intergenic		forward	bedaquiline, clofazimine	84
mmpR	778990	779487	CDS	Rv0678	forward	bedaquiline, clofazimine	498
rpsL upstream	781312	781559	intergenic		forward	streptomycin	248
rpsL	781560	781934	CDS	Rv0682	forward	streptomycin	375
rplC upstream	800793	800808	intergenic		forward	linezolid	16
rplC	800809	801462	CDS	Rv0701	forward	linezolid	654
rpfB upstream	1127884	1128090	intergenic		forward	clarithromycin	207
rpfB, ksgA	1128091	1130105	CDS	Rv1009, Rv1010	forward	clarithromycin	2015
mshB upstream	1300125	1300303	intergenic		forward	isoniazid	179
mshB	1300304	1301215	CDS	Rv1170	forward	isoniazid	912
fbiC upstream	1302682	1302930	intergenic		forward	delamanid, PA-824	249
fbiC	1302931	1305501	CDS	Rv1173	forward	delamanid, PA-824	2571
sigI upstream	1332011	1332091	intergenic		forward	isoniazid	81
sigI	1332092	1332964	CDS	Rv1189	forward	isoniazid	873
folP2 upstream	1351126	1351190	intergenic		forward	co-trimoxazole	65
folP2	1351191	1352147	CDS	Rv1207	forward	co-trimoxazole	957
tap	1406081	1407340	CDS	Rv1258c	reverse	streptomycin, PAS	1260
tap upstream	1407341	1408238	CDS	Rv1259	reverse	streptomycin, PAS	898
embR	1416181	1417347	CDS	Rv1267c	reverse	ethambutol	1167
embR upstream	1417348	1417657	intergenic		reverse	ethambutol	310
atpE upstream	1460997	1461044	intergenic		forward	bedaquiline	48
atpE	1461045	1461290	CDS	Rv1305	forward	bedaquiline	246
rrs upstream	1471743	1471845	intergenic		forward	streptomycin, amikacin, kanamycin, capreomycin	103
rrs	1471846	1473382	rRNA	Rvnr01	forward	streptomycin, amikacin, kanamycin, capreomycin	1537
rrl upstream	1473383	1473657	intergenic		forward	linezolid, capreomycin, clarithromycin	275
rrl	1473658	1476795	rRNA	Rvnr02	forward	linezolid, capreomycin, clarithromycin	3138
ldtD upstream	1611271	1611433	intergenic		forward	beta-lactams	163
ldtD	1611434	1612249	CDS	Rv1433	forward	beta-lactams	816
fabG1 upstream	1673300	1673439	intergenic		forward	isoniazid, ethionamide, prothionamide	140
fabG1	1673440	1674183	CDS	Rv1483	forward	isoniazid, ethionamide, prothionamide	744
inhA upstream	1674184	1674201	intergenic		forward	isoniazid, ethionamide, prothionamide	18
inhA	1674202	1675011	CDS	Rv1484	forward	isoniazid, ethionamide, prothionamide	810
pykA upstream	1816082	1816188	intergenic		forward	cycloserine	107
pykA	1816189	1817607	CDS	Rv1617	forward	cycloserine	1419
rpsA upstream	1833380	1833541	intergenic		forward	pyrazinamide	162
rpsA	1833542	1834987	CDS	Rv1630	forward	pyrazinamide	1446
tlyA	1917940	1918746	CDS	Rv1694	forward	capreomycin	807
cycA	1929786	1931456	CDS	Rv1704c	reverse	cycloserine	1671
cycA upstream	1931457	1932654	intergenic		reverse	cycloserine	1198
eccB5 upstream	2017477	2017739	intergenic		forward	moxifloxacin, gatifloxacin, ofloxacin, levofloxacin	263
eccB5,eccC5	2017740	2023432	CDS	Rv1782,Rv1783	forward	moxifloxacin, gatifloxacin, ofloxacin, levofloxacin	5693
ndh	2101651	2103042	CDS	Rv1854c	reverse	isoniazid, ethionamide, prothionamide, clofazimine, thioridazine	1392
ndh upstream	2103043	2103183	intergenic		reverse	isoniazid, ethionamide, prothionamide, clofazimine, thioridazine	141
katG	2153889	2156111	CDS	Rv1908c	reverse	isoniazid	2223
katG upstream	2156112	2156148	intergenic		reverse	isoniazid	37
furA	2156149	2156592	CDS	Rv1909c	reverse	isoniazid	444
furA upstream	2156593	2156705	intergenic		reverse	isoniazid	113
Rv1979c	2221719	2223164	CDS	Rv1979c	reverse	bedaquiline, clofazimine	1446
Rv1979c upstream	2223165	2223342	intergenic		reverse	bedaquiline, clofazimine	178
erm(37) upstream	2231455	2231679	intergenic		forward	clarithromycin	225
erm(37)	2231680	2232219	CDS	Rv1988	forward	clarithromycin	540
pncA	2288681	2289241	CDS	Rv2043c	reverse	pyrazinamide	561
pncA upstream	2289242	2289281	intergenic		reverse	pyrazinamide	40
blaC	2325886	2326809	CDS	Rv2068c	reverse	beta-lactams	924
blaC upstream	2326810	2326943	intergenic		reverse	beta-lactams	134
mshC	2391215	2392459	CDS	Rv2130c	reverse	isoniazid, ethionamide, prothionamide	1245
mshC upstream	2392460	2392516	intergenic		reverse	isoniazid, ethionamide, prothionamide	57
kasA	2518115	2519365	CDS	Rv2245	forward	isoniazid	1251
eis	2714124	2715332	CDS	Rv2416c	reverse	kanamycin	1209
eis upstream	2715333	2715471	intergenic		reverse	kanamycin	139
ahpC upstream	2726088	2726192	intergenic		forward	compensates for KatG deficit	105
ahpC	2726193	2726780	CDS	Rv2428	forward	compensates for KatG deficit	588
folC	2746135	2747598	CDS	Rv2447c	reverse	PAS	1464
ldtB	2834109	2835335	CDS	Rv2518c	reverse	beta-lactams	1227
ldtB upstream	2835336	2835493	intergenic		reverse	beta-lactams	158
pepQ	2859300	2860418	CDS	Rv2535c	reverse	bedaquiline, clofazimine	1119
pepQ upstream	2860419	2860451	intergenic		reverse	bedaquiline, clofazimine	33
Rv2671 upstream	2985731	2986838	CDS	Rv2670c	forward	PAS	1108
Rv2671	2986839	2987615	CDS	Rv2671	forward	PAS	777
Rv2731	3043026	3044378	CDS	Rv2731	forward	pyrazinamide	1353
thyX	3067193	3067945	CDS	Rv2754c	reverse	compensates for ThyA deficit	753
thyX upstream	3067946	3068188	intergenic		reverse	compensates for ThyA deficit	243
dfrA	3073130	3073609	CDS	Rv2763c	reverse	PAS, co-trimoxazole	480
dfrA upstream	3073610	3073679	intergenic		reverse	PAS, co-trimoxazole	70
thyA	3073680	3074471	CDS	Rv2764c	reverse	PAS	792
thyA upstream	3074472	3074635	intergenic		reverse	PAS	164
ald upstream	3086755	3086819	intergenic		forward	cycloserine	65
ald	3086820	3087935	CDS	Rv2780	forward	cycloserine	1116
gpsI	3090339	3092597	CDS	Rv2783c	reverse	pyrazinamide	2259
gpsI upstream	3092598	3092950	intergenic		reverse	pyrazinamide	353
dacB2 upstream	3218271	3218338			forward	beta-lactams	68
dacB2	3218339	3219214	CDS	Rv2911	forward	beta-lactams	876
ddlA	3336796	3337917	CDS	Rv2981c	reverse	cycloserine	1122
ddlA upstream	3337918	3337994	intergenic		reverse	cycloserine	77
serB2	3401933	3403162	CDS	Rv3042c	reverse	clofazimine	1230
serB2 upstream	3403163	3403199	intergenic		reverse	clofazimine	37
mymA upstream	3448427	3448503	intergenic		forward	isoniazid, ethionamide, prothionamide	77
mymA	3448504	3449991	CDS	Rv3083	forward	isoniazid, ethionamide, prothionamide	1488
Rv3169	3537238	3538362	CDS	Rv3169	forward	pyrazinamide	1125
whiB7	3568401	3568679	CDS	Rv3197A	reverse	streptomycin, kanamycin, clarithromycin, PAS	279
whiB7 upstream	3568680	3569108	intergenic		reverse	streptomycin, kanamycin, clarithromycin, PAS	429
nudC	3571602	3572543	CDS	Rv3199c	reverse	isoniazid, ethionamide, prothionamide	942
nudC upstream	3572544	3572601	intergenic		reverse	isoniazid, ethionamide, prothionamide	58
fbiA upstream	3640142	3640542	intergenic		forward	delamanid, PA-824	401
fbiA,B	3640543	3642881	CDS	Rv3261,Rv3262	forward	delamanid, PA-824	2339
alr	3840194	3841420	CDS	Rv3423c	reverse	cycloserine	1227
alr upstream	3841421	3841713	intergenic		reverse	cycloserine	293
rpoA	3877464	3878507	CDS	Rv3457c	reverse	compensates for rpoB mutations	1044
rpoA upstream	3878508	3878658	intergenic		reverse	compensates for rpoB mutations	151
ddn upstream	3986733	3986843	intergenic		forward	delamanid, PA-824	111
ddn	3986844	3987299	CDS	Rv3547	forward	delamanid, PA-824	456
nat	4007331	4008182	CDS	Rv3566c	reverse	isoniazid	852
nat upstream	4008183	4008433	CDS	Rv3566A	reverse	isoniazid	251
panD	4043862	4044281	CDS	Rv3601c	reverse	pyrazinamide	420
folP1	4049138	4049980	CDS	Rv3608c	reverse	PAS, co-trimoxazole	843
folP1 upstream	4049981	4050585	CDS	Rv3609c	reverse	PAS, co-trimoxazole	605
aftA,embC	4237932	4243147	CDS	Rv3792,Rv3793	forward	ethambutol	5216
embA upstream	4243148	4243232	intergenic		forward	ethambutol	85
embA,embB	4243233	4249810	CDS	Rv3794,Rv3795	forward	ethambutol	6578
ubiA	4268925	4269833	CDS	Rv3806c	reverse	ethambutol	909
ubiA upstream	4269834	4269839	intergenic		reverse	ethambutol	6
ethA	4326004	4327473	CDS	Rv3854c	reverse	ethionamide, prothionamide, thioacetazone	1470
ethA upstream	4327474	4327548	intergenic		reverse	ethionamide, prothionamide, thioacetazone	75
ethR	4327549	4328199	CDS	Rv3855	forward	ethionamide, prothionamide, thioacetazone	651
gidB	4407528	4408202	CDS	Rv3919c	reverse	streptomycin	675
gidB upstream	4408203	4408333	intergenic		reverse	streptomycin	131
